# Supplementary material for: SARS-CoV-2 Pandemic Tracing in Italy Highlights Lineages with Mutational Burden in Growing Subsets
Source: MDPI journal article supplement (doi:10.3390/ijms23084155), 2022-04-09
Supplement: s1 [file s1]

| Genome pos.  | 241  | 445    | 913   | 1059  | 3037  | 3267  | 4002  | 4543  | 5170  | 5388  | 5629  | 5986  | 6286  | 6954  | 7086  | 7767  | 8047  | 8140  | 8782  | 9130  | 9526  | 10097              | 10252 |
|--------------|------|--------|-------|-------|-------|-------|-------|-------|-------|-------|-------|-------|-------|-------|-------|-------|-------|-------|-------|-------|-------|--------------------|-------|
| Region       | 5UTR | ORF1ab |       |       |       |       |       |       |       |       |       |       |       |       |       |       |       |       |       |       |       |                    |       |
| Region pos.  | 241  | 60     | 216   | 265   | 924   | 1001  | 1246  | 1426  | 1635  | 1708  | 1788  | 1907  | 2007  | 2230  | 2274  | 2501  | 2594  | 2625  | 2839  | 2955  | 3087  | 3278               | 3329  |
| Peptide      |      | Leader | Nsp2  |       |       | Nsp3  |       |       |       |       |       |       |       |       |       |       |       |       | Nsp4  |       |       | 3C-like proteinase |       |
| Peptide pos. |      | 60     | 36    | 85    | 106   | 183   | 428   | 608   | 817   | 890   | 970   | 1089  | 1189  | 1412  | 1456  | 1683  | 1776  | 1807  | 76    | 192   | 324   | 15                 | 66    |
| 19A          | C    | T (V)  | C (S) | C (T) | C (F) | C (T) | C (T) | C (T) | C (Y) | C (A) | G (T) | C (F) | C (T) | T (I) | C (T) | T (I) | C (Y) | C (S) | C (S) | G (V) | G (M) | G (G)              | C (F) |
| 19B          | C    | T (V)  | C (S) | C (T) | C (F) | C (T) | C (T) | C (T) | C (Y) | C (A) | G (T) | C (F) | C (T) | T (I) | C (T) | T (I) | C (Y) | C (S) | T (S) | G (V) | G (M) | G (G)              | C (F) |
| 20A          | T    | T (V)  | C (S) | C (T) | T (F) | C (T) | C (T) | C (T) | C (Y) | C (A) | G (T) | C (F) | C (T) | T (I) | C (T) | T (I) | C (Y) | C (S) | C (S) | G (V) | G (M) | G (G)              | C (F) |
| S01          | T    | T (V)  | C (S) | C (T) | T (F) | C (T) | C (T) | C (T) | C (Y) | C (A) | G (T) | C (F) | C (T) | T (I) | C (T) | C (T) | T (Y) | C (S) | C (S) | G (V) | G (M) | G (G)              | C (F) |
| S06          | T    | T (V)  | C (S) | C (T) | T (F) | C (T) | C (T) | T (T) | C (Y) | C (A) | T (T) | C (F) | C (T) | T (I) | C (T) | T (I) | C (Y) | C (S) | C (S) | G (V) | T (I) | G (G)              | C (F) |
| S07          | T    | T (V)  | C (S) | C (T) | T (F) | C (T) | C (T) | T (T) | C (Y) | C (A) | T (T) | C (F) | C (T) | T (I) | C (T) | T (I) | C (Y) | C (S) | C (S) | G (V) | T (I) | G (G)              | C (F) |
| S08          | T    | C (V)  | C (S) | C (T) | T (F) | C (T) | C (T) | C (T) | T (Y) | C (A) | G (T) | C (F) | T (T) | T (I) | C (T) | T (I) | C (Y) | T (S) | C (S) | G (V) | G (M) | G (G)              | C (F) |
| S09          | T    | C (V)  | C (S) | C (T) | T (F) | C (T) | C (T) | C (T) | C (Y) | C (A) | G (T) | C (F) | T (T) | T (I) | C (T) | T (I) | C (Y) | C (S) | C (S) | G (V) | G (M) | G (G)              | C (F) |
| S10          | T    | C (V)  | C (S) | C (T) | T (F) | C (T) | C (T) | C (T) | C (Y) | C (A) | G (T) | C (F) | T (T) | T (I) | T (I) | T (I) | C (Y) | C (S) | C (S) | G (V) | G (M) | G (G)              | C (F) |
| 20B          | T    | T (V)  | C (S) | C (T) | T (F) | C (T) | C (T) | C (T) | C (Y) | C (A) | G (T) | C (F) | C (T) | T (I) | C (T) | T (I) | C (Y) | C (S) | C (S) | G (V) | G (M) | G (G)              | C (F) |
| S02          | T    | T (V)  | C (S) | C (T) | T (F) | C (T) | T (I) | C (T) | C (Y) | C (A) | G (T) | C (F) | C (T) | T (I) | C (T) | T (I) | C (Y) | C (S) | C (S) | G (V) | G (M) | A (S)              | T (F) |
| S03          | T    | T (V)  | C (S) | C (T) | T (F) | C (T) | T (I) | C (T) | C (Y) | C (A) | G (T) | C (F) | C (T) | T (I) | C (T) | T (I) | C (Y) | C (S) | C (S) | G (V) | G (M) | A (S)              | T (F) |
| S04          | T    | T (V)  | T (S) | C (T) | T (F) | T (I) | C (T) | C (T) | C (Y) | A (D) | G (T) | T (F) | C (T) | C (T) | C (T) | T (I) | C (Y) | C (S) | C (S) | G (V) | G (M) | G (G)              | C (F) |
| S05          | T    | T (V)  | C (S) | C (T) | T (F) | C (T) | C (T) | C (T) | C (Y) | C (A) | G (T) | C (F) | C (T) | T (I) | C (T) | T (I) | C (Y) | C (S) | C (S) | T (V) | G (M) | G (G)              | C (F) |
| 20C          | T    | T (V)  | C (S) | T (I) | T (F) | C (T) | C (T) | C (T) | C (Y) | C (A) | G (T) | C (F) | C (T) | T (I) | C (T) | T (I) | C (Y) | C (S) | C (S) | G (V) | G (M) | G (G)              | C (F) |

| Genome pos.  | 11132  | 288-112 | 291-112 | 294-112 | 11497 | 11956 | 13536 | 13993 | 14408 | 14676 | 15279 | 15766 | 16111 | 16176 | 16889    | 17019 | 17104 | 17615 | 18877          | 20268      | 21138   | 21154 | 21255 |
|--------------|--------|---------|---------|---------|-------|-------|-------|-------|-------|-------|-------|-------|-------|-------|----------|-------|-------|-------|----------------|------------|---------|-------|-------|
| Region       | ORF1ab |         |         |         |       |       |       |       |       |       |       |       |       |       |          |       |       |       |                |            |         |       |       |
| Region pos.  | 3623   | 3675    | 3676    | 3677    | 3744  | 3897  | 4424  | 4577  | 4715  | 4804  | 5005  | 5168  | 5283  | 5304  | 5542     | 5585  | 5614  | 5784  | 6205           | 6668       | 6958    | 6964  | 6997  |
| Peptide      | Nsp6   |         |         |         |       | Nsp7  | RdRp  |       |       |       |       |       |       |       | Helicase |       |       |       | 3'-to-5' exon. | endoR NAse | 2'-o-MT |       |       |
| Peptide pos. | 54     | 106     | 107     | 108     | 175   | 38    | 32    | 185   | 323   | 412   | 613   | 776   | 891   | 912   | 218      | 261   | 290   | 460   | 280            | 216        | 160     | 166   | 199   |
| 19A          | G (A)  | TCT (S) | GGT (G) | TTT (F) | C (Y) | C (D) | C (Y) | G (A) | C (P) | C (P) | C (H) | G (V) | C (L) | T (T) | A (K)    | G (E) | C (H) | A (K) | C (L)          | A (L)      | G (K)   | T (S) | G (A) |
| 19B          | G (A)  | TCT (S) | GGT (G) | TTT (F) | C (Y) | C (D) | C (Y) | G (A) | C (P) | C (P) | C (H) | G (V) | C (L) | T (T) | A (K)    | G (E) | C (H) | A (K) | C (L)          | A (L)      | G (K)   | T (S) | G (A) |
| 20A          | G (A)  | TCT (S) | GGT (G) | TTT (F) | C (Y) | C (D) | C (Y) | G (A) | T (L) | C (P) | C (H) | G (V) | C (L) | T (T) | A (K)    | G (E) | C (H) | A (K) | C (L)          | A (L)      | G (K)   | T (S) | G (A) |
| S01          | G (A)  | TCT (S) | GGT (G) | TTT (F) | C (Y) | C (D) | C (Y) | G (A) | T (L) | C (P) | C (H) | G (V) | C (L) | T (T) | A (K)    | G (E) | T (Y) | A (K) | C (L)          | G (L)      | G (K)   | T (S) | G (A) |
| S06          | G (A)  | TCT (S) | GGT (G) | TTT (F) | T (Y) | C (D) | C (Y) | T (S) | T (L) | C (P) | C (H) | T (L) | C (L) | T (T) | G (R)    | T (D) | C (H) | A (K) | T (L)          | A (L)      | G (K)   | T (S) | G (A) |
| S07          | G (A)  | TCT (S) | GGT (G) | TTT (F) | T (Y) | C (D) | C (Y) | T (S) | T (L) | C (P) | C (H) | T (L) | C (L) | T (T) | G (R)    | T (D) | C (H) | A (K) | T (L)          | A (L)      | G (K)   | T (S) | G (A) |
| S08          | T (S)  | TCT (S) | GGT (G) | TTT (F) | C (Y) | C (D) | C (Y) | G (A) | T (L) | C (P) | C (H) | G (V) | C (L) | T (T) | A (K)    | G (E) | C (H) | A (K) | C (L)          | A (L)      | G (K)   | T (S) | C (A) |
| S09          | G (A)  | TCT (S) | GGT (G) | TTT (F) | C (Y) | C (D) | C (Y) | G (A) | T (L) | C (P) | C (H) | G (V) | C (L) | T (T) | A (K)    | G (E) | C (H) | A (K) | C (L)          | A (L)      | G (K)   | T (S) | C (A) |
| S10          | G (A)  | TCT (S) | GGT (G) | TTT (F) | C (Y) | C (D) | C (Y) | G (A) | T (L) | C (P) | C (H) | G (V) | C (L) | T (T) | A (K)    | G (E) | C (H) | A (K) | C (L)          | A (L)      | G (K)   | T (S) | C (A) |
| 20B          | G (A)  | TCT (S) | GGT (G) | TTT (F) | C (Y) | C (D) | C (Y) | G (A) | T (L) | C (P) | C (H) | G (V) | C (L) | T (T) | A (K)    | G (E) | C (H) | A (K) | C (L)          | A (L)      | G (K)   | T (S) | G (A) |
| S02          | G (A)  | TCT (S) | GGT (G) | TTT (F) | C (Y) | T (D) | T (Y) | G (A) | T (L) | C (P) | C (H) | G (V) | C (L) | T (T) | A (K)    | G (E) | C (H) | A (K) | C (L)          | A (L)      | A (K)   | G (A) | G (A) |
| S03          | G (A)  | TCT (S) | GGT (G) | TTT (F) | C (Y) | T (D) | T (Y) | G (A) | T (L) | C (P) | C (H) | G (V) | C (L) | T (T) | A (K)    | G (E) | C (H) | A (K) | C (L)          | A (L)      | A (K)   | G (A) | G (A) |
| S04          | G (A)  | --- (-) | --- (-) | --- (-) | C (Y) | C (D) | C (Y) | G (A) | T (L) | T (P) | T (H) | G (V) | C (L) | C (T) | A (K)    | G (E) | C (H) | G (R) | C (L)          | A (L)      | G (K)   | T (S) | G (A) |
| S05          | G (A)  | TCT (S) | GGT (G) | TTT (F) | C (Y) | C (D) | C (Y) | G (A) | T (L) | C (P) | C (H) | G (V) | T (L) | T (T) | A (K)    | G (E) | C (H) | A (K) | C (L)          | A (L)      | G (K)   | T (S) | G (A) |
| 20C          | G (A)  | TCT (S) | GGT (G) | TTT (F) | C (Y) | C (D) | C (Y) | G (A) | T (L) | C (P) | C (H) | G (V) | C (L) | T (T) | A (K)    | G (E) | C (H) | A (K) | C (L)          | A (L)      | G (K)   | T (S) | G (A) |

| Genome pos.  | 21765<br>-21766 | 21767<br>-21769 | 21770 | 21991 | 992-219 | 22227 | 22879 | 22992 | 23063 | 23271 | 23403 | 23477 | 23587 | 23604 | 23709 | 23731 | 24506 | 24914 | 25563 | 25710 | 26735 | 26801 | 26876 |
|--------------|-----------------|-----------------|-------|-------|---------|-------|-------|-------|-------|-------|-------|-------|-------|-------|-------|-------|-------|-------|-------|-------|-------|-------|-------|
| Region       | S               |                 |       |       |         |       |       |       |       |       |       |       |       |       |       |       |       |       | ORF3a |       | M     |       |       |
| Region pos.  | 68              | 69              | 70    | 143   | 144     | 222   | 439   | 477   | 501   | 570   | 614   | 639   | 675   | 681   | 716   | 723   | 982   | 1118  | 57    | 106   | 71    | 93    | 118   |
| Peptide      |                 |                 |       |       |         |       |       |       |       |       |       |       |       |       |       |       |       |       |       |       |       |       |       |
| Peptide pos. |                 |                 |       |       |         |       |       |       |       |       |       |       |       |       |       |       |       |       |       |       |       |       |       |
| 19A          | ATA (I)         | CAT (H)         | G (V) | T (V) | TAT (Y) | C (A) | C (N) | G (S) | A (N) | C (A) | A (D) | G (G) | G (Q) | C (P) | C (T) | C (T) | T (S) | G (D) | G (Q) | C (L) | C (Y) | C (L) | T (I) |
| 19B          | ATA (I)         | CAT (H)         | G (V) | T (V) | TAT (Y) | C (A) | C (N) | G (S) | A (N) | C (A) | A (D) | G (G) | G (Q) | C (P) | C (T) | C (T) | T (S) | G (D) | G (Q) | C (L) | C (Y) | C (L) | T (I) |
| 20A          | ATA (I)         | CAT (H)         | G (V) | T (V) | TAT (Y) | C (A) | C (N) | G (S) | A (N) | C (A) | G (G) | G (G) | G (Q) | C (P) | C (T) | C (T) | T (S) | G (D) | G (Q) | C (L) | C (Y) | C (L) | T (I) |
| S01          | ATA (I)         | CAT (H)         | G (V) | T (V) | TAT (Y) | C (A) | A (K) | G (S) | A (N) | C (A) | G (G) | G (G) | G (Q) | C (P) | C (T) | C (T) | T (S) | G (D) | G (Q) | C (L) | C (Y) | C (L) | T (I) |
| S06          | ATA (I)         | CAT (H)         | G (V) | T (V) | TAT (Y) | C (A) | C (N) | A (N) | A (N) | C (A) | G (G) | G (G) | G (Q) | C (P) | C (T) | C (T) | T (S) | G (D) | T (H) | T (L) | T (Y) | C (L) | C (I) |
| S07          | ATA (I)         | CAT (H)         | G (V) | T (V) | TAT (Y) | C (A) | C (N) | A (N) | A (N) | C (A) | G (G) | G (G) | G (Q) | C (P) | C (T) | C (T) | T (S) | G (D) | T (H) | T (L) | T (Y) | C (L) | C (I) |
| S08          | ATA (I)         | CAT (H)         | G (V) | T (V) | TAT (Y) | T (V) | C (N) | G (S) | A (N) | C (A) | G (G) | G (G) | T (H) | C (P) | C (T) | C (T) | T (S) | G (D) | G (Q) | C (L) | C (Y) | G (L) | T (I) |
| S09          | ATA (I)         | CAT (H)         | G (V) | T (V) | TAT (Y) | T (V) | C (N) | G (S) | A (N) | C (A) | G (G) | G (G) | G (Q) | C (P) | C (T) | C (T) | T (S) | G (D) | G (Q) | C (L) | C (Y) | G (L) | T (I) |
| S10          | ATA (I)         | CAT (H)         | G (V) | T (V) | TAT (Y) | T (V) | C (N) | G (S) | A (N) | C (A) | G (G) | A (S) | G (Q) | C (P) | C (T) | C (T) | T (S) | G (D) | G (Q) | C (L) | C (Y) | G (L) | T (I) |
| 20B          | ATA (I)         | CAT (H)         | G (V) | T (V) | TAT (Y) | C (A) | C (N) | G (S) | A (N) | C (A) | G (G) | G (G) | G (Q) | C (P) | C (T) | C (T) | T (S) | G (D) | G (Q) | C (L) | C (Y) | C (L) | T (I) |
| S02          | ATA (I)         | CAT (H)         | G (V) | T (V) | TAT (Y) | C (A) | C (N) | G (S) | A (N) | C (A) | G (G) | G (G) | G (Q) | C (P) | C (T) | T (T) | T (S) | G (D) | G (Q) | C (L) | C (Y) | C (L) | T (I) |
| S03          | ATA (I)         | CAT (H)         | G (V) | T (V) | TAT (Y) | C (A) | C (N) | G (S) | A (N) | C (A) | G (G) | G (G) | G (Q) | C (P) | C (T) | T (T) | T (S) | G (D) | G (Q) | C (L) | C (Y) | C (L) | T (I) |
| S04          | A-- (-)         | --- (-)         | - (-) | - (-) | --T (-) | C (A) | C (N) | G (S) | T (Y) | A (D) | G (G) | G (G) | G (Q) | A (H) | T (I) | C (T) | G (A) | C (H) | G (Q) | C (L) | C (Y) | C (L) | T (I) |
| S05          | ATA (I)         | CAT (H)         | G (V) | T (V) | TAT (Y) | C (A) | C (N) | G (S) | A (N) | C (A) | G (G) | G (G) | G (Q) | C (P) | C (T) | C (T) | T (S) | G (D) | G (Q) | C (L) | C (Y) | C (L) | T (I) |
| 20C          | ATA (I)         | CAT (H)         | G (V) | T (V) | TAT (Y) | C (A) | C (N) | G (S) | A (N) | C (A) | G (G) | G (G) | G (Q) | C (P) | C (T) | C (T) | T (S) | G (D) | T (H) | C (L) | C (Y) | C (L) | T (I) |

| Genome pos.  | 27319 | 27800 | 27944 | 27972 | 27982 | 28048 | 28111 | 28144 | 28280<br>-28282 | 28487 | 28868 | 28881<br>-28882 | 28883 | 28932 | 28975 | 28977 | 29366 | 29399 | 29645 | 29706 | 29734 |
|--------------|-------|-------|-------|-------|-------|-------|-------|-------|-----------------|-------|-------|-----------------|-------|-------|-------|-------|-------|-------|-------|-------|-------|
| Region       | ORF6  | ORF7b | ORF8  |       |       |       |       |       | ORFN            |       |       |                 |       |       |       |       |       |       | ORF10 | 3UTR  |       |
| Region pos.  | 40    | 15    | 17    | 27    | 30    | 52    | 73    | 84    | 3               | 72    | 199   | 203             | 204   | 220   | 234   | 235   | 365   | 376   | 30    | 32    | 60    |
| Peptide      |       |       |       |       |       |       |       |       |                 |       |       |                 |       |       |       |       |       |       |       |       |       |
| Peptide pos. |       |       |       |       |       |       |       |       |                 |       |       |                 |       |       |       |       |       |       |       |       |       |
| 19A          | T (L) | C (A) | C (H) | C (Q) | C (P) | G (R) | A (Y) | T (L) | GAT (D)         | G (V) | C (P) | AGG (R)         | G (G) | C (A) | G (M) | C (S) | C (P) | G (A) | G (V) | G     | G     |
| 19B          | T (L) | C (A) | C (H) | C (Q) | C (P) | G (R) | A (Y) | C (S) | GAT (D)         | G (V) | C (P) | AGG (R)         | G (G) | C (A) | G (M) | C (S) | C (P) | G (A) | G (V) | G     | G     |
| 20A          | T (L) | C (A) | C (H) | C (Q) | C (P) | G (R) | A (Y) | T (L) | GAT (D)         | G (V) | C (P) | AGG (R)         | G (G) | C (A) | G (M) | C (S) | C (P) | G (A) | G (V) | G     | G     |
| S01          | T (L) | A (A) | C (H) | C (Q) | C (P) | G (R) | A (Y) | T (L) | GAT (D)         | G (V) | C (P) | AGG (R)         | G (G) | C (A) | G (M) | C (S) | C (P) | G (A) | G (V) | G     | C     |
| S06          | T (L) | C (A) | C (H) | C (Q) | C (P) | G (R) | A (Y) | T (L) | GAT (D)         | G (V) | C (P) | AGG (R)         | G (G) | C (A) | C (I) | C (S) | C (P) | A (T) | G (V) | G     | G     |
| S07          | T (L) | C (A) | C (H) | C (Q) | C (P) | G (R) | A (Y) | T (L) | GAT (D)         | G (V) | C (P) | AGG (R)         | G (G) | C (A) | C (I) | C (S) | C (P) | A (T) | G (V) | G     | G     |
| S08          | T (L) | C (A) | C (H) | C (Q) | T (L) | G (R) | A (Y) | T (L) | GAT (D)         | G (V) | C (P) | AGG (R)         | G (G) | T (V) | G (M) | C (S) | C (P) | G (A) | T (L) | G     | G     |
| S09          | T (L) | C (A) | T (H) | C (Q) | C (P) | G (R) | A (Y) | T (L) | GAT (D)         | G (V) | C (P) | AGG (R)         | G (G) | T (V) | G (M) | C (S) | C (P) | G (A) | T (L) | G     | G     |
| S10          | T (L) | C (A) | C (H) | C (Q) | C (P) | G (R) | A (Y) | T (L) | GAT (D)         | G (V) | C (P) | AGG (R)         | G (G) | T (V) | G (M) | C (S) | T (S) | G (A) | T (L) | G     | G     |
| 20B          | T (L) | C (A) | C (H) | C (Q) | C (P) | G (R) | A (Y) | T (L) | GAT (D)         | G (V) | C (P) | AAA (K)         | C (R) | C (A) | G (M) | C (S) | C (P) | G (A) | G (V) | G     | G     |
| S02          | T (L) | C (A) | C (H) | C (Q) | C (P) | G (R) | A (Y) | T (L) | GAT (D)         | G (V) | C (P) | AAA (K)         | C (R) | C (A) | G (M) | C (S) | C (P) | G (A) | G (V) | G     | G     |
| S03          | T (L) | C (A) | C (H) | C (Q) | C (P) | G (R) | A (Y) | T (L) | GAT (D)         | G (V) | C (P) | AAA (K)         | C (R) | C (A) | G (M) | C (S) | C (P) | G (A) | G (V) | G     | G     |
| S04          | T (L) | C (A) | C (H) | T (*) | C (P) | T (I) | G (C) | T (L) | CTA (L)         | G (V) | C (P) | AAA (K)         | C (R) | C (A) | G (M) | T (F) | C (P) | G (A) | G (V) | G     | G     |
| S05          | C (L) | C (A) | C (H) | C (Q) | C (P) | G (R) | A (Y) | T (L) | GAT (D)         | A (I) | T (S) | AAA (K)         | C (R) | C (A) | G (M) | C (S) | C (P) | G (A) | G (V) | T     | G     |
| 20C          | T (L) | C (A) | C (H) | C (Q) | C (P) | G (R) | A (Y) | T (L) | GAT (D)         | G (V) | C (P) | AGG (R)         | G (G) | C (A) | G (M) | C (S) | C (P) | G (A) | G (V) | G     | G     |
