# Supplementary material for: SARS-CoV-2 Pandemic Tracing in Italy Highlights Lineages with Mutational Burden in Growing Subsets
Source: MDPI journal article supplement (doi:10.3390/ijms23084155), 2022-04-09
Supplement: s1 [file s1]

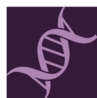

Article

# SARS-Cov-2 Pandemic Tracing in Italy Highlights Lineages with Mutational Burden in Growing Subsets

Angelo Boccia <sup>1</sup>, Rossella Tufano <sup>1</sup>, Veronica Ferrucci <sup>1,2</sup>, Leandra Sepe <sup>1,2</sup>, Martina Bianchi <sup>3</sup>, Stefano Pascarella <sup>3</sup>, Massimo Zollo <sup>1,2,4,\*</sup> and Giovanni Paoletta <sup>1,2,\*</sup>

<sup>1</sup> CEINGE Biotecnologie Avanzate, Naples, 80145, Italy;

<sup>2</sup> Dipartimento di Medicina Molecolare e Biotecnologie Mediche (DMMBM), “Federico II” University of Naples, Naples, 80131, Italy;

<sup>3</sup> Sapienza Università di Roma, Department of Biochemical Sciences “A. Rossi Fanelli”, Rome 00185, Italy;

<sup>4</sup> DAI Medicina di Laboratorio e Trasfusionale, AOU Azienda Ospedaliera ‘Federico II’, Naples, 80131, Italy;

\* Correspondence: GP [giovanni.paoletta@unina.it](mailto:giovanni.paoletta@unina.it); MZ [massimo.zollo@unina.it](mailto:massimo.zollo@unina.it)

**Citation:** Boccia, A.; Tufano, R.; Ferrucci, V.; Sepe, L.; Bianchi, M.; Pascarella, S.; Zollo, M.; Paoletta, G. SARS-CoV-2 Pandemic Tracing in Italy Highlights Lineages with Mutational Burden in Growing Subsets. *Int. J. Mol. Sci.* **2022**, *23*, 4155. <https://doi.org/10.3390/ijms23084155>

Academic Editor: Chih-Jen Yang

Received: 2 March 2022

Accepted: 6 April 2022

Published: 9 April 2022

**Publisher’s Note:** MDPI stays neutral with regard to jurisdictional claims in published maps and institutional affiliations.

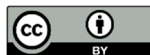

**Copyright:** © 2022 by the authors. Licensee MDPI, Basel, Switzerland. This article is an open access article distributed under the terms and conditions of the Creative Commons Attribution (CC BY) license (<https://creativecommons.org/licenses/by/4.0/>).

**Table S1.** Relationship between subsets and Nextstrain clades.

|     | 19A | 19B | 20A  | 20A.EU2 | 20A<br>N.194L | 20B  | 20B<br>S.484K | 20C | 20D  | 20E<br>(EU1) | 20F | 20G | 20H<br>501Y.V2 | 20I<br>501Y.V1 |
|-----|-----|-----|------|---------|---------------|------|---------------|-----|------|--------------|-----|-----|----------------|----------------|
| S01 | 0   | 0   | 0,05 | 0       | 0             | 0    | 0             | 0   | 0    | 0            | 0   | 0   | 0              | 0              |
| S02 | 0   | 0   | 0    | 0       | 0             | 0    | 0             | 0   | 0,35 | 0            | 0   | 0   | 0              | 0              |
| S03 | 0   | 0   | 0    | 0       | 0             | 0    | 0             | 0   | 0,68 | 0            | 0   | 0   | 0              | 0              |
| S04 | 0   | 0   | 0    | 0       | 0             | 0    | 0             | 0   | 0    | 0            | 0   | 0   | 0              | 1              |
| S05 | 0   | 0   | 0    | 0       | 0             | 0,04 | 0             | 0   | 0    | 0            | 0   | 0   | 0              | 0              |
| S06 | 0   | 0   | 0    | 0,19    | 0             | 0    | 0             | 0   | 0    | 0            | 0   | 0   | 0              | 0              |
| S07 | 0   | 0   | 0    | 1       | 0             | 0    | 0             | 0   | 0    | 0            | 0   | 0   | 0              | 0              |
| S08 | 0   | 0   | 0    | 0       | 0             | 0    | 0             | 0   | 0    | 0,12         | 0   | 0   | 0              | 0              |
| S09 | 0   | 0   | 0    | 0       | 0             | 0    | 0             | 0   | 0    | 0,08         | 0   | 0   | 0              | 0              |
| S10 | 0   | 0   | 0    | 0       | 0             | 0    | 0             | 0   | 0    | 0,12         | 0   | 0   | 0              | 0              |

The number reported in each cell indicates the degree of overlap between subset and clade, with '1' representing a perfect match and '0' no overlap.

**Table S2.** Multiple alignment of the consensus sequence of each subset with major clades.

External file: [Table S2.pdf](#)

For the sole positions changed in at least one consensus, compared to the reference one (Wuhan-Hu-1, Refseq NC\_045512.2), either the original or the mutated base are reported. The affected mRNA/ORF codon(s) and the genomic coordinates are indicated in the header. For each position both nucleotides and the corresponding amino acid (in brackets) are reported. Sites showing in the subsets a synonymous or non-synonymous change, compared with parent clades, are indicated in light and dark yellow, respectively.

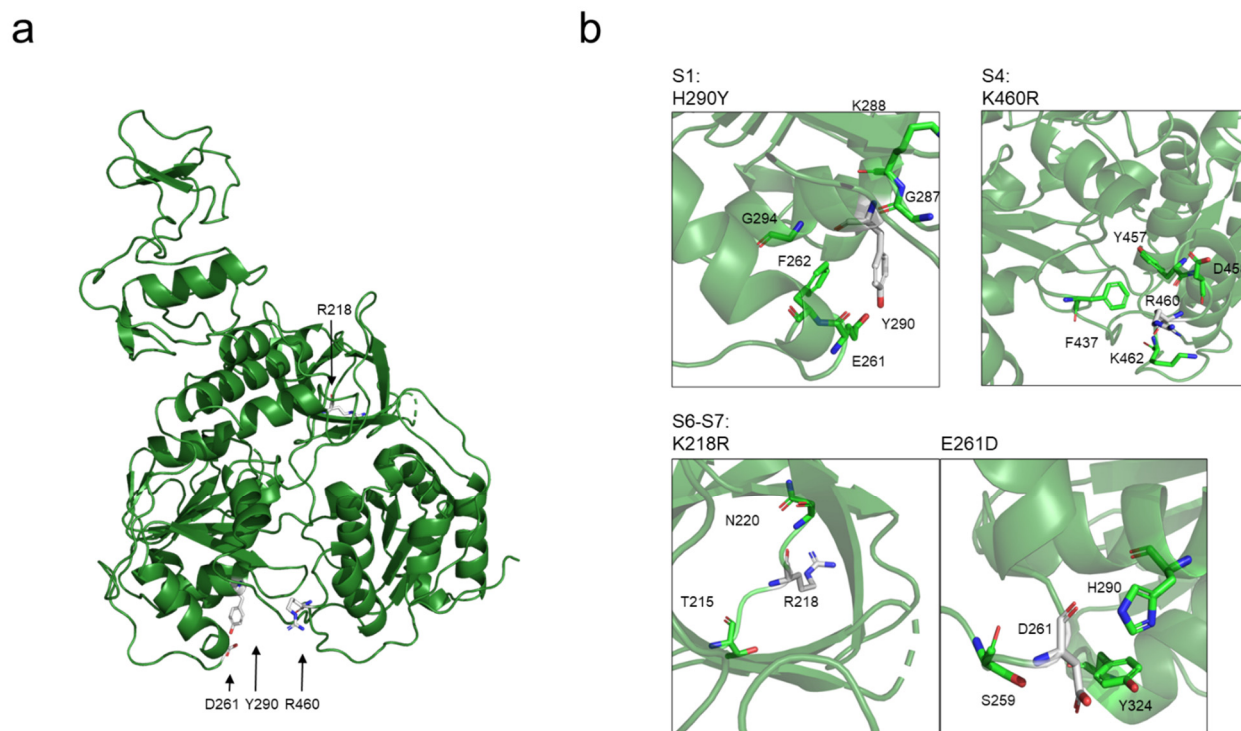**Figure S1.** Structural analysis of NSP13 protein. a) Cartoon representation of the protein. b) Residues located in proximity of mutated site are displayed as sticks and labelled.

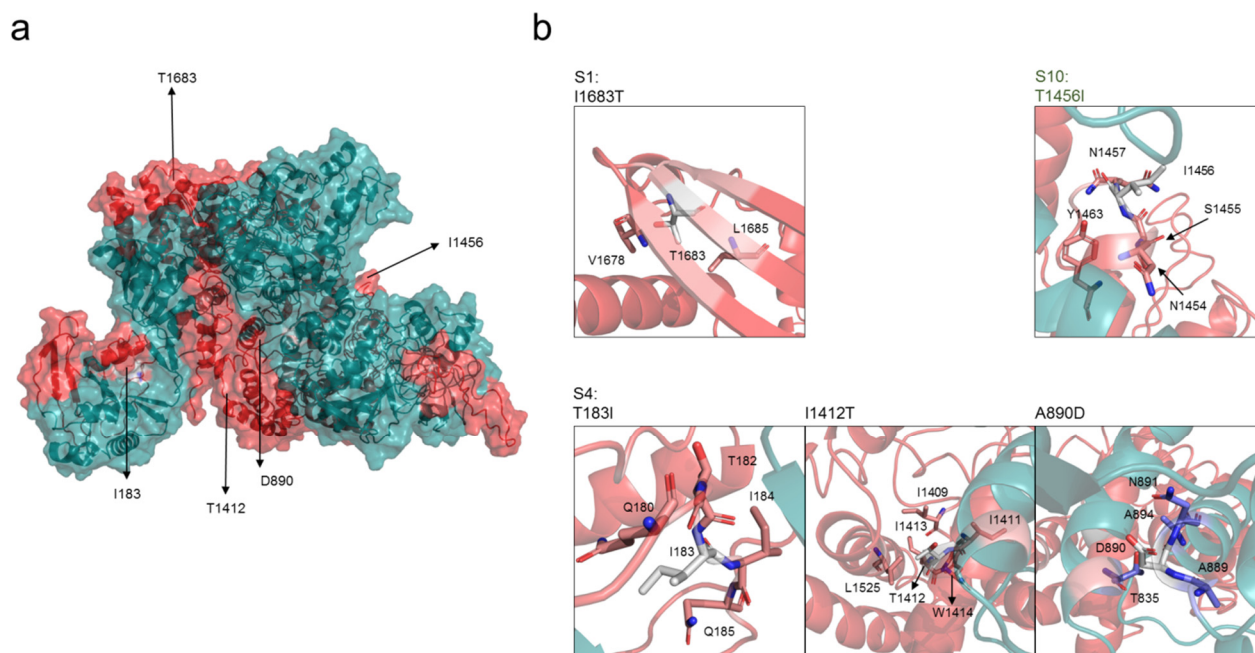

**Figure S2.** Structural analysis of NSP3 protein. a) Surface representation of SARS-CoV-2 NSP3 model, structured domains are shown in sky-blue and unstructured domains are shown in red. b) The mutated sites are highlighted in the black box. Residues located in proximity of mutated site are displayed as sticks and labelled.

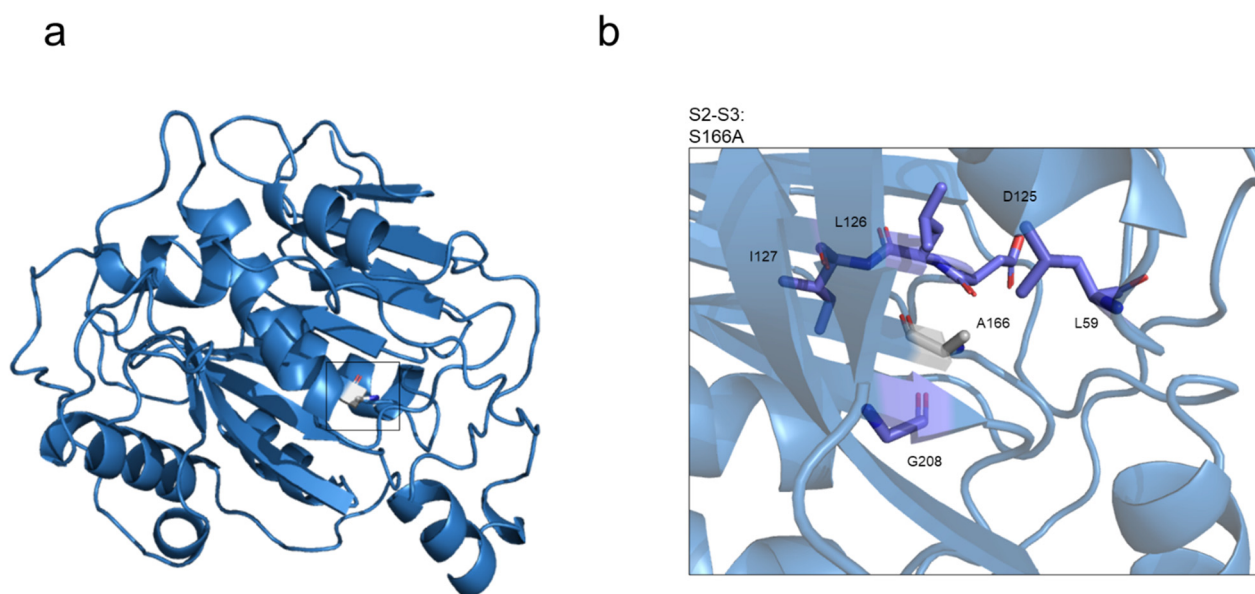

**Figure S3.** Structural analysis of NSP16 protein. a) Cartoon representation of the SARS-CoV-2 NSP16. The mutated site is highlighted in the black box. b) Residues located in proximity of mutated site are displayed as sticks and labelled.

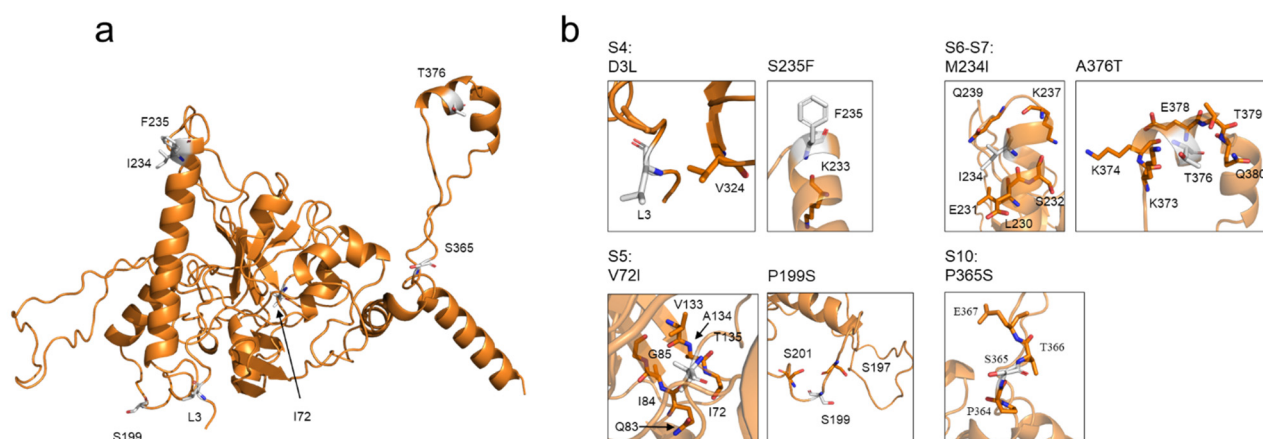

**Figure S4.** Structural analysis of N protein. a) Three-dimensional model. b) Residues located in proximity of mutated site are displayed as sticks and labelled.

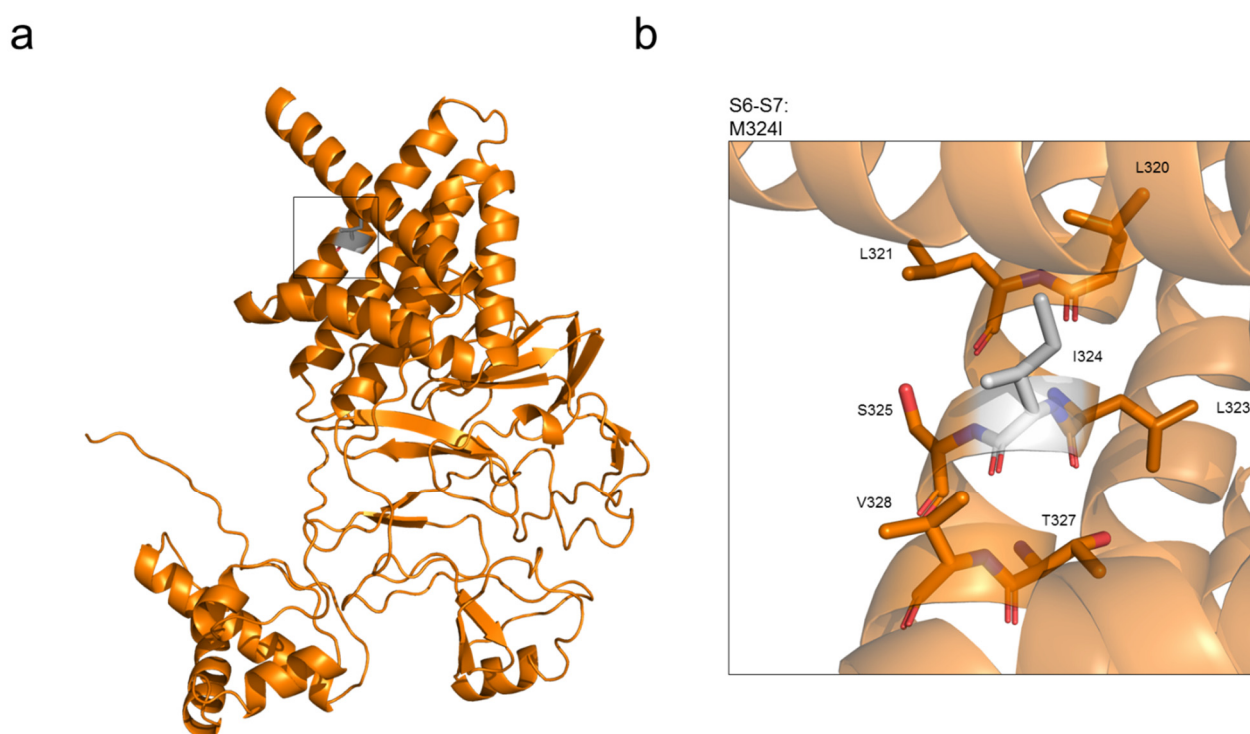

**Figure S5.** Structural analysis of NSP4 protein. a) Cartoon representation of the protein; the mutated site is highlighted in the black box. b) Detail of I324, corresponding to the mutated site. Residues located in proximity of mutated site are displayed as sticks and labelled.



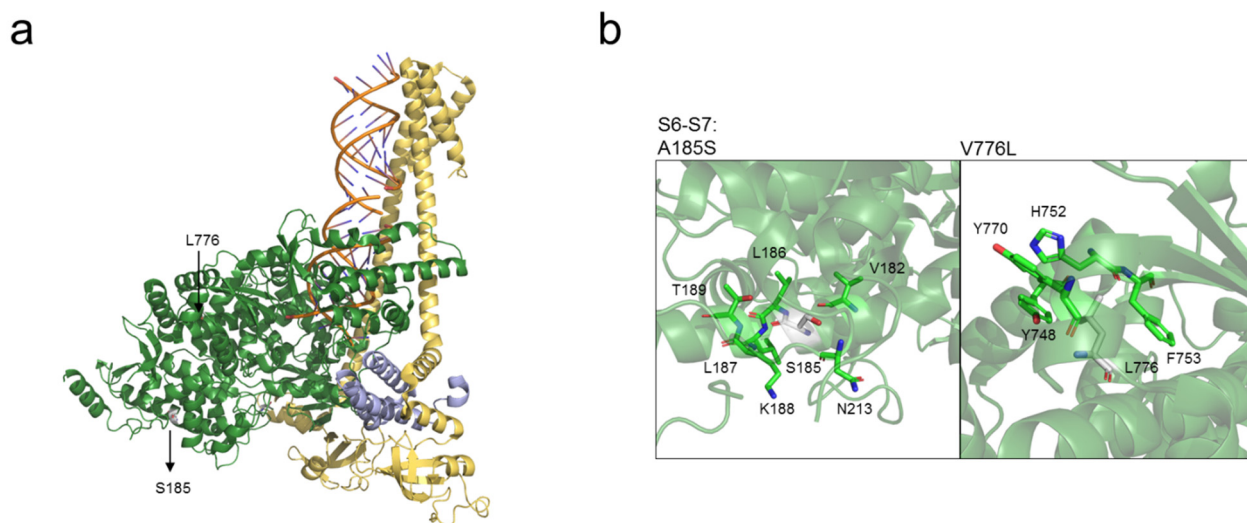

**Figure S6.** Structural analysis of NSP12 protein. a) Structure of the replicating SARS-CoV-2 polymerase. NSP8 subunits are represented as yellow cartoon. NSP7 and NSP12 as light blue and green cartoon respectively. RNA is in orange. b) Detail of the sites containing the mutant residues.

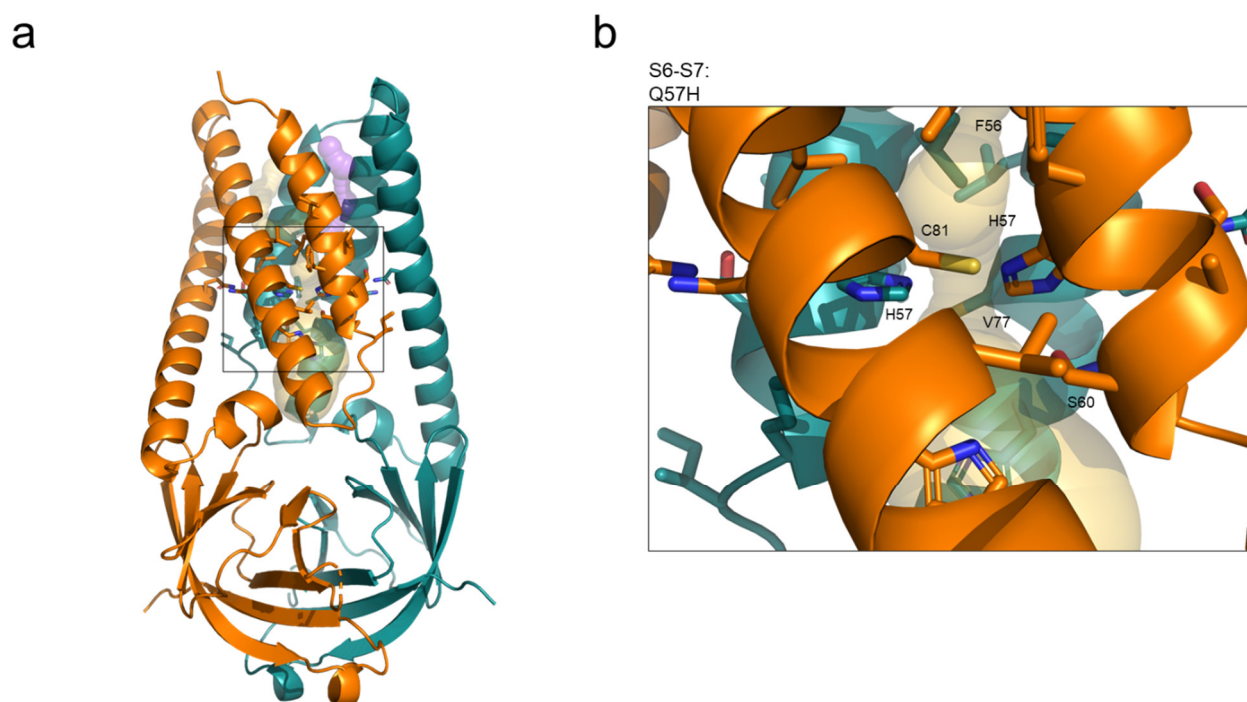

**Figure S7.** Structural analysis of ORF3a dimer. a) The two subunits are represented as orange and deep teal ribbons. b) Detail of the mutant site and surrounding residues. Residues are displayed as labelled sticks. Transparent yellow spheres delimit part of the central pore. The dimer is represented with the two-fold axis of symmetry approximately parallel to the sheet plane.

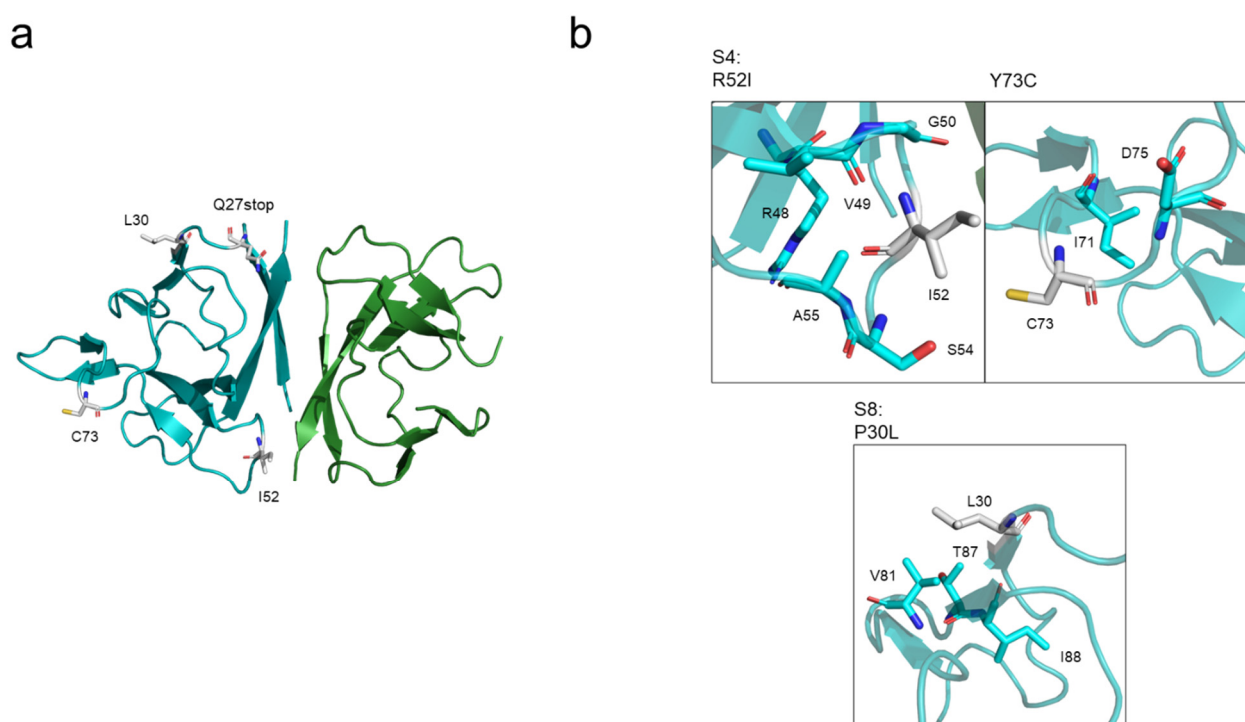

**Figure S8.** Structural analysis of ORF8 protein. a) Cartoon representation of the SARS-CoV-2 ORF8. The two monomers are displayed in green and cyan, respectively. b) Residues located in proximity of mutated site are displayed as sticks and labelled.

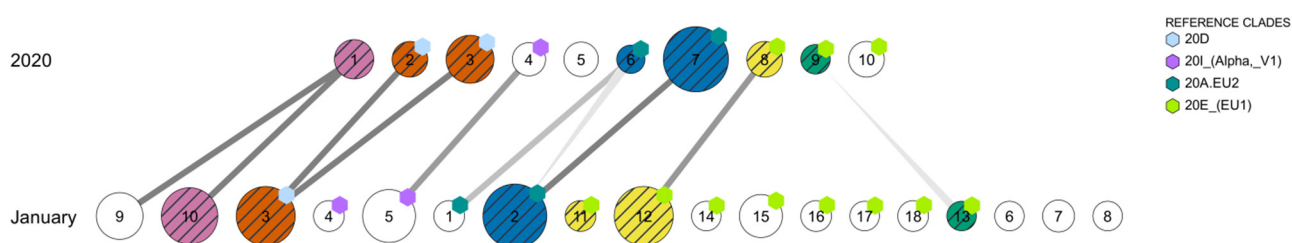

**Figure S9.** Comparison of '2020' and 'January' subsets. The figure shows the relationships between subsets identified in the analysis of the '2020' dataset and those derived from the first dataset used for the tracing analysis. See 'Figure 3' for a full description of the elements reported in the figure.

**Table S3.** Subset relationship with known clades/lineages

| Subset  | Clade       | Pango      |          | Subset   | Clade       | Pango      |          |
|---------|-------------|------------|----------|----------|-------------|------------|----------|
|         |             | Assignment | Relation |          |             | Assignment | Relation |
| January |             |            |          | February |             |            |          |
| 1       | 20A.EU2     | B.1.160    | par      | 1        | 20A         | B.1.416    | ovr      |
| 2       | 20A.EU2     | B.1.160    | ovr      | 2        | 20A         | B.1.258    | par      |
| 3       | 20D         | C.18       | ovr      | 3        | 20A.EU2     | B.1.160    | con      |
| 4       | 20I (Alpha) | B.1.1.7    | par      | 4        | 20A.EU2     | B.1.160    | con      |
| 5       | 20I (Alpha) | B.1.1.7    | ovr      | 5        | 20A.EU2     | B.1.160    | par      |
| 6       | 20B         | B.1.1.229  | con      | 6        | 20A         | B.1.221    | ovr      |
| 7       | 20A         | B.1.221    | ovr      | 7        | 20E (EU1)   | B.1.177    | par      |
| 8       | 20A         | B.1.416    | ovr      | 8        | 20E (EU1)   | B.1.177    | par      |
| 9       | 20A         | B.1.258.14 | sub      | 9        | 20E (EU1)   | B.1.177    | par      |
| 10      | 20A         | B.1.258    | sub      | 10       | 20E (EU1)   | B.1.177    | par      |
| 11      | 20E (EU1)   | B.1.177    | par      | 11       | 20E (EU1)   | B.1.177.75 | con      |
| 12      | 20E (EU1)   | B.1.177    | par      | 12       | 20E (EU1)   | B.1.177.83 | ovr      |
| 13      | 20E (EU1)   | B.1.177    | par      | 13       | 20E (EU1)   | B.1.177    | par      |
| 14      | 20E (EU1)   | B.1.177.75 | con      | 14       | 20E (EU1)   | B.1.177    | par      |
| 15      | 20E (EU1)   | B.1.177.75 | con      | 15       | 20D         | C.18       | ovr      |
| 16      | 20E (EU1)   | B.1.177.83 | con      | 16       | 20D         | C.18       | sub      |
| 17      | 20E (EU1)   | B.1.177    | par      | 17       | 20I (Alpha) | B.1.1.7    | par      |
| 18      | 20E (EU1)   | B.1.177    | par      |          |             |            |          |
| March   |             |            |          | April    |             |            |          |
| 1       | 20H (Beta)  | B.1.351    | sub      | 1        | 19B         | A          | par      |
| 2       | 20A.EU2     | B.1.160    | sub      | 2        | 20H (Beta)  | B.1.351    | ovr      |
| 3       | 20A         | B.1.258.17 | ovr      | 3        | 20A.EU2     | B.1.160    | ovr      |
| 4       | 20A         | B.1.258    | con      | 4        | 20A         | B.1.258    | con      |
| 5       | 20A         | B.1.258    | con      | 5        | 20A         | B.1.258    | con      |
| 6       | 20E (EU1)   | B.1.177    | par      | 6        | 20A         | B.1.258    | con      |
| 7       | 20E (EU1)   | B.1.177    | par      | 7        | 20E (EU1)   | B.1.177    | par      |
| 8       | 20E (EU1)   | B.1.177.75 | con      | 8        | 20E (EU1)   | B.1.177.75 | con      |
| 9       | 20E (EU1)   | B.1.177    | par      | 9        | 20E (EU1)   | B.1.177    | par      |
| 10      | 20D         | C.18       | sub      | 10       | 20J (Gamma) | P.1.1      | ovr      |
| 11      | 20J (Gamma) | P.1.1      | ovr      | 11       | 20I (Alpha) | B.1.1.7    | par      |
| 12      | 20I (Alpha) | B.1.1.7    | par      | 12       | 20I (Alpha) | B.1.1.7    | par      |
| 13      | 20I (Alpha) | B.1.1.7    | par      | 13       | 20I (Alpha) | B.1.1.7    | par      |
| 14      | 20I (Alpha) | B.1.1.7    | par      | 14       | 20I (Alpha) | B.1.1.7    | par      |
| 15      | 20I (Alpha) | B.1.1.7    | par      | 15       | 20I (Alpha) | B.1.1.7    | par      |
| 16      | 20I (Alpha) | B.1.1.7    | par      | 16       | 20I (Alpha) | B.1.1.7    | par      |
| 17      | 20I (Alpha) | B.1.1.7    | par      | 17       | 20I (Alpha) | B.1.1.7    | par      |
|         |             |            |          | 18       | 20I (Alpha) | B.1.1.7    | par      |
| May     |             |            |          | June     |             |            |          |
| 1       | 20A         | B.1.258    | ovr      | 1        | 20H (Beta)  | B.1.351    | ovr      |
| 2       | 20H (Beta)  | B.1.351    | ovr      | 2        | 21A (Delta) | B.1.617.2  | ovr      |
| 3       | 21D (Eta)   | B.1.525    | ovr      | 3        | 21D (Eta)   | B.1.525    | ovr      |
| 4       | 20J (Gamma) | P.1.1      | ovr      | 4        | 20I (Alpha) | B.1.1.7    | par      |
| 5       | 20I (Alpha) | B.1.1.7    | par      | 5        | 20I (Alpha) | B.1.1.7    | par      |
| 6       | 20I (Alpha) | B.1.1.7    | par      | 6        | 20I (Alpha) | B.1.1.7    | par      |
| 7       | 20I (Alpha) | B.1.1.7    | par      | 7        | 20I (Alpha) | B.1.1.7    | par      |
| 8       | 20I (Alpha) | B.1.1.7    | par      | 8        | 20I (Alpha) | B.1.1.7    | par      |
| 9       | 20I (Alpha) | B.1.1.7    | par      | 9        | 20I (Alpha) | B.1.1.7    | par      |
| 10      | 20I (Alpha) | B.1.1.7    | par      | 10       | 20I (Alpha) | B.1.1.7    | par      |
| 11      | 20I (Alpha) | B.1.1.7    | par      | 11       | 20I (Alpha) | B.1.1.7    | par      |
| 12      | 20I (Alpha) | B.1.1.7    | par      |          |             |            |          |
| 13      | 20I (Alpha) | B.1.1.7    | par      |          |             |            |          |

|    |             |         |     |
|----|-------------|---------|-----|
| 14 | 20I (Alpha) | B.1.1.7 | par |
| 15 | 20I (Alpha) | B.1.1.7 | par |

  

| July |             |           |     | August |             |           |     |
|------|-------------|-----------|-----|--------|-------------|-----------|-----|
| 1    | 21A (Delta) | B.1.617.2 | par | 1      | 20H (Beta)  | B.1.351   | sub |
| 2    | 21A (Delta) | B.1.617.2 | par | 2      | 21A (Delta) | B.1.617.2 | par |
| 3    | 21A (Delta) | B.1.617.2 | par | 3      | 21A (Delta) | B.1.617.2 | par |
| 4    | 20H (Beta)  | B.1.351   | par | 4      | 21A (Delta) | B.1.617.2 | par |
| 5    | 21D (Eta)   | B.1.525   | ovr | 5      | 21A (Delta) | B.1.617.2 | par |
| 6    | 20J (Gamma) | P.1.1     | con | 6      | 21D (Eta)   | B.1.525   | ovr |
| 7    | 20I (Alpha) | B.1.1.7   | par | 7      | 20I (Alpha) | B.1.1.7   | par |
| 8    | 20I (Alpha) | B.1.1.7   | par |        |             |           |     |
| 9    | 20I (Alpha) | B.1.1.7   | par |        |             |           |     |

  

| September |             |           |     | October |             |           |      |
|-----------|-------------|-----------|-----|---------|-------------|-----------|------|
| 1         | 21A (Delta) | B.1.617.2 | par | 1       | 21A (Delta) | B.1.617.2 | sub* |
| 2         | 21A (Delta) | B.1.617.2 | par | 2       | 21A (Delta) | AY.122    | con* |
| 3         | 21A (Delta) | B.1.617.2 | par | 3       | 21A (Delta) | AY.102    | sub* |
| 4         | 21A (Delta) | B.1.617.2 | par | 4       | 21A (Delta) | AY.43     | con  |
|           |             |           |     | 5       | 21A (Delta) | AY.43     | con  |
|           |             |           |     | 6       | 21A (Delta) | AY.43     | con  |

  

| November |             |           |      | December |             |         |     |
|----------|-------------|-----------|------|----------|-------------|---------|-----|
| 1        | 20J (Gamma) | P.1.1     | con  | 1        | 21A (Delta) | AY.9.2  | ovr |
| 2        | 21A (Delta) | B.1.617.2 | par  | 2        | 21A (Delta) | AY.122  | con |
| 3        | 21A (Delta) | B.1.617.2 | par* | 3        | 21A (Delta) | AY.43   | con |
| 4        | 21A (Delta) | AY.43     | con  | 4        | 21A (Delta) | AY.4    | con |
| 5        | 21A (Delta) | AY.42     | ovr  | 5        | 21A (Delta) | AY.4    | con |
| 6        | 21A (Delta) | AY.4      | con  | 6        | 21A (Delta) | AY.46.6 | ovr |
| 7        | 21A (Delta) | AY.4      | con  | 7        | 21A (Delta) | AY.98.1 | ovr |
| 8        | 21A (Delta) | AY.122    | con  | 8        | 21A (Delta) | AY.122  | con |
| 9        | 21A (Delta) | AY.98.1   | ovr  |          |             |         |     |

The analysis covers all subsets identified in 2021, organized by dataset. For each subset the closest Nextstrain clade and Pango lineage are indicated. The relation with the Pango lineage was evaluated by using the official pangolin tool, as described under ‘Materials and Methods’, and annotated as follows:

ovr Pango lineage overlaps with the subset;

con Pango lineage contains the subset;

par Pango lineage is coincident with the Nextstrain parental clade from which the subset is derived;

sub Pango lineage is a subpart of the subset.

#### Table S4. GISAID acknowledgments.

External file: *Table S4.xlsx*

List of analyses GISAID sequences grouped by dataset, provided with authors and originating and submitting laboratory.

#### Supplementary File 1. Sampling rules for the 2020 dataset

External file: *builds\_2020.yaml*

Sampling rules used in the Nextstrain/ncov workflow to analyze the 2020 dataset.

#### Supplementary File 2. Sampling rules for 2021 datasets

External file: *builds\_2021.yaml*

Sampling rules used in the Nextstrain/ncov workflow to analyze the 2021 datasets.



---

**Supplementary File 3.** Nextstrain clades signatures

*External file: clade\_signatures.txt*
